# Supplementary material for: Modeling Brownian Microparticle Trajectories in Lab-on-a-Chip Devices with Time Varying Dielectrophoretic or Optical Forces
Source: MDPI journal article supplement (doi:10.3390/mi12101265), 2021-10-18
Supplement: s1 [file s1]

# Supplementary Information: A python platform for simulating Brownian dynamics in lab-on-a-chip devices

<sup>1,\*</sup>, Mohammad Asif Zaman<sup>1,\*</sup>, Mo Wu<sup>1</sup>, Punnapadhy<sup>1</sup>, Michael A. Jensen<sup>2</sup>, Lambertus Hesselink<sup>1</sup>, and Ronald W. Davis<sup>2,3</sup>

<sup>1</sup>Department of Electrical Engineering, Stanford University, Stanford, CA 94305, USA

<sup>2</sup>Stanford Genome Technology Center, Department of Biochemistry, Stanford University, Palo Alto, CA 94304, USA

<sup>3</sup>Department of Genetics, Stanford University, Palo Alto, CA 94304, USA

\*zaman@stanford.edu

## Clausius-Mossotti factor and Dielectric Function of Cells

The dielectrophoretic force equation (under dipole approximation) contains the frequency dependent Clausius-Mossotti factor,  $\tilde{C}_M(\omega)$ . Here  $\omega = 2\pi f$  is the angular frequency of the AC electric field ( $f$  is the frequency in Hz). The  $\sim$  symbol over a variable indicates that it is a complex number. We note that the sign of  $\Re[\tilde{C}_M(\omega)]$  determines the direction of the force. Positive  $\tilde{C}_M(\omega)$  gives positive DEP (i.e. particles attracted to high electric field regions) and negative  $\tilde{C}_M(\omega)$  results in negative DEP (i.e. particles repelled from high electric field regions).  $\tilde{C}_M(\omega)$  is a measure of the effective polarizability of the particle in the medium. It is defined as<sup>1</sup>:

$$\tilde{C}_M(\omega) = \frac{\tilde{\epsilon}_c(\omega) - \tilde{\epsilon}_m(\omega)}{\tilde{\epsilon}_c(\omega) + 2\tilde{\epsilon}_m(\omega)}. \quad (S1)$$

Here  $\tilde{\epsilon}_{m,c}(\omega)$  is the complex dielectric functions of the materials. The subscripts  $m$  and  $c$  represent the suspension medium and the cell (yeast), respectively. The complex dielectric function of the medium is modeled as:

$$\tilde{\epsilon}_m(\omega) = \epsilon_m - i \frac{\sigma_m}{\omega \epsilon_0} \quad (S2)$$

where  $\epsilon_m$  is the relative permittivity, and  $\sigma_m$  is the conductivity of the medium. We use  $\epsilon_m = 80$  and  $\sigma_m = 0.8 \times 10^{-3}$  S/m in our calculations<sup>2</sup>. Eq. S2 holds for homogeneous isotropic particles/objects.

Cells have more complex structures than homogeneous particles. They are composed of different distinct materials (cytoplasm surrounded by a thin cell membrane). Thus, a more complex approach is necessary to model  $\tilde{\epsilon}_c$ . A shell-model is often used to model the effective dielectric function of cells<sup>3-5</sup>. According to this model,  $\tilde{\epsilon}_c$  is given by<sup>1</sup>:

$$\tilde{\epsilon}_c = \tilde{\epsilon}_{\text{mem}} \frac{\left(\frac{r_2}{r_1}\right)^3 + 2 \frac{\tilde{\epsilon}_{\text{cyt}} - \tilde{\epsilon}_{\text{mem}}}{\tilde{\epsilon}_{\text{cyt}} + 2\tilde{\epsilon}_{\text{mem}}}}{\left(\frac{r_2}{r_1}\right)^3 - \frac{\tilde{\epsilon}_{\text{cyt}} - \tilde{\epsilon}_{\text{mem}}}{\tilde{\epsilon}_{\text{cyt}} + 2\tilde{\epsilon}_{\text{mem}}}}, \quad (S3)$$

where  $\tilde{\epsilon}_{\text{cyt}}$  and  $\tilde{\epsilon}_{\text{mem}}$  have the same form as Eq. S2 and represent the complex dielectric function of the cytoplasm and membrane, respectively, and  $r_1$  and  $r_2$  are the inner and outer cell radii, respectively. The material properties of the cytoplasm and cell membrane is needed to evaluate the dielectric function of a cell. The conductivity, relative permittivity and the geometric parameters of live and dead yeast cells have been reported in the literature<sup>2,6</sup>. By plugging in these values, it is possible to calculate the Clausius-Mossotti factor of live and dead yeast cells using Eq. S1, S2, and S3. The results are shown in Fig. S1. It can be noted that the frequency response of a live cell is significantly different than that of a dead cell. It is possible to find frequency regimes when their responses have opposite signs. For the cell sorter/separator LOC considered in this paper, the frequency of interest is  $f = 5$  MHz. We can note that at that frequency,  $\Re[\tilde{C}_M(\omega)] > 0$  for live cells (viable) and  $\Re[\tilde{C}_M(\omega)] < 0$  for dead cells (nonviable). The exact numbers are:  $\Re[\tilde{C}_{M, \text{viable}}] = 0.945$  and  $\Re[\tilde{C}_{M, \text{nonviable}}] = -0.25$ . Thus, for an AC electric field with frequency 5 MHz, the live cells will experience positive DEP forces where as the dead cells will experience negative DEP forces. This is consistent with results found in literature<sup>5,7</sup>. Due to the opposing DEP forces, it is possible to separate the two types of cell.

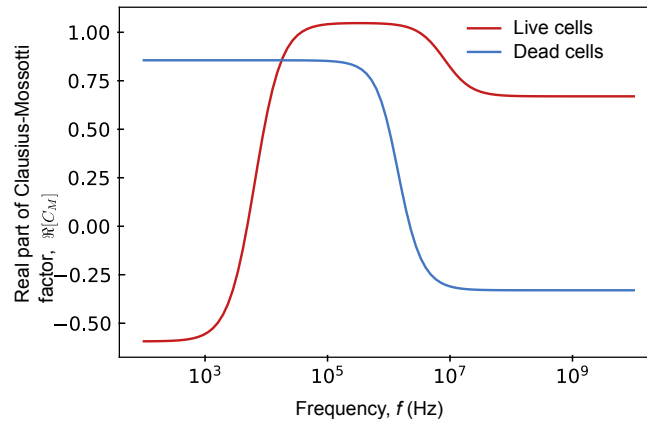

**Figure S1.** Real part of the Clausius-Mossotti factor for live and dead yeast cells.

## References

1. Pethig, R. Review article—dielectrophoresis: Status of the theory, technology, and applications. *Biomechanics* **4**, 022811 (2010). DOI 10.1063/1.3456626.
2. Talary, M. S., Burt, J. P. H., Tame, J. A. & Pethig, R. Electromanipulation and separation of cells using travelling electric fields. *J. Phys. D: Appl. Phys.* **29**, 2198–2203 (1996). DOI 10.1088/0022-3727/29/8/021.
3. Gagnon, Z. R. Cellular dielectrophoresis: Applications to the characterization, manipulation, separation and patterning of cells. *ELECTROPHORESIS* **32**, 2466–2487 (2011). DOI 10.1002/elps.201100060.
4. Adams, T. N. G., Turner, P. A., Janorkar, A. V., Zhao, F. & Minerick, A. R. Characterizing the dielectric properties of human mesenchymal stem cells and the effects of charged elastin-like polypeptide copolymer treatment. *Biomechanics* **8**, 054109 (2014). DOI 10.1063/1.4895756.
5. Ettehad, H. M. & Wenger, C. Characterization and separation of live and dead yeast cells using CMOS-based DEP microfluidics. *Micromachines* **12**, 270 (2021). DOI 10.3390/mi12030270.
6. Asami, K., Hanai, T. & Koizumi, N. Dielectric properties of yeast cells. *The J. Membr. Biol.* **28**, 169–180 (1976). DOI 10.1007/bf01869695.
7. Doh, I. & Cho, Y.-H. A continuous cell separation chip using hydrodynamic dielectrophoresis (DEP) process. *Sensors Actuators A: Phys.* **121**, 59–65 (2005). DOI 10.1016/j.sna.2005.01.030.
